# Supplementary material
Source: Springer Nature journal article supplement (https://www.springermedizin.de/resource/supplementary/13014_2013_1203_MOESM3_ESM.pdf/9634828)

**A.****Percent**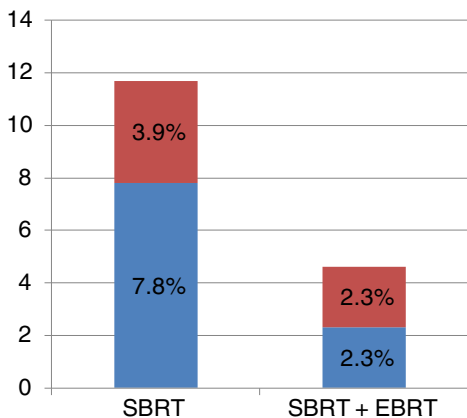

Likelihood ratio P=0.39

**B.****Percent**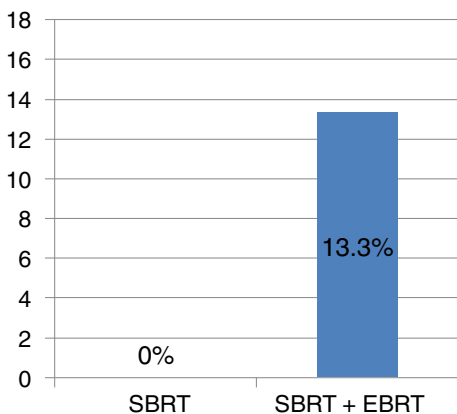

Likelihood ratio P=0.0019

**C.****Patients**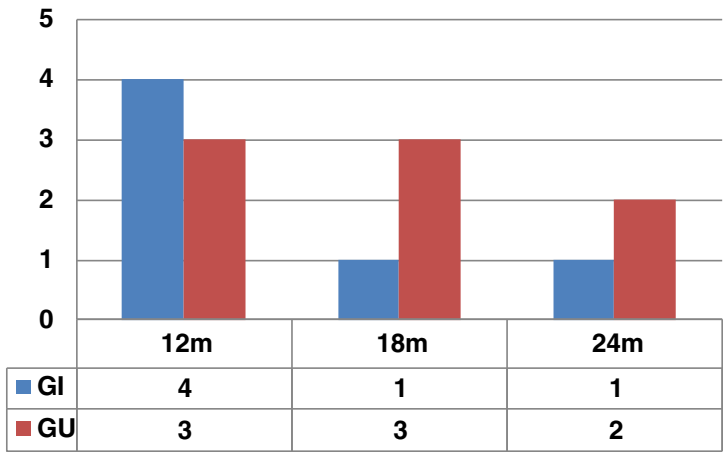

Supplement: MOESM3 [file 9634828]
